# Supplementary material for: Automated tracking of mitotic spindle pole positions shows that LGN is required for spindle rotation but not orientation maintenance
Source: PubMed Central journal article supplement — Cell Cycle. 2013 Jul 16;12(16):2643–55. doi: 10.4161/cc.25671 (PMC3865054; doi:10.4161/cc.25671), 2013-07-16
Supplement: cc-12-2643-s03.pdf [file cc-12-2643-s03.pdf]

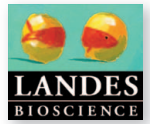

## **Supplemental Material to:**

**Adam M Corrigan, Roshan L Shrestha, Ihsan Zulkipli,  
Noriko Hiroi, Yingjun Liu, Naoka Tamura, Bing Yang, Jessica  
Patel, Akira Funahashi, Athene Donald, and Viji M Draviam**

**Automated tracking of mitotic spindle pole positions  
shows that LGN is required for spindle rotation but not  
orientation maintenance**

**Cell Cycle 2013; 12(16)**

**<http://dx.doi.org/10.4161/cc.25671>**

**<http://www.landesbioscience.com/journals/cc/article/25671>**

**A** Cumulative Mitotic Timing

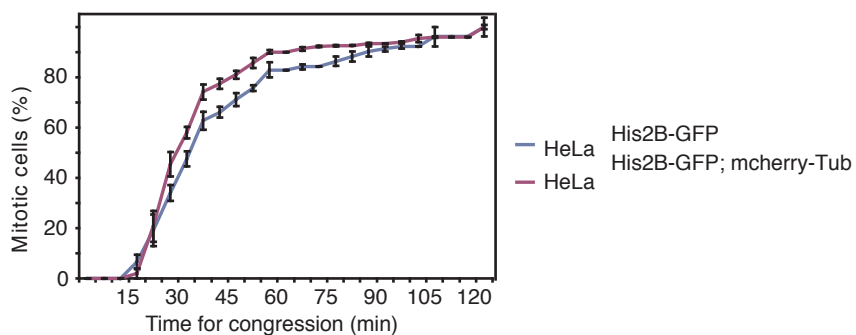

**B** Spindle architecture

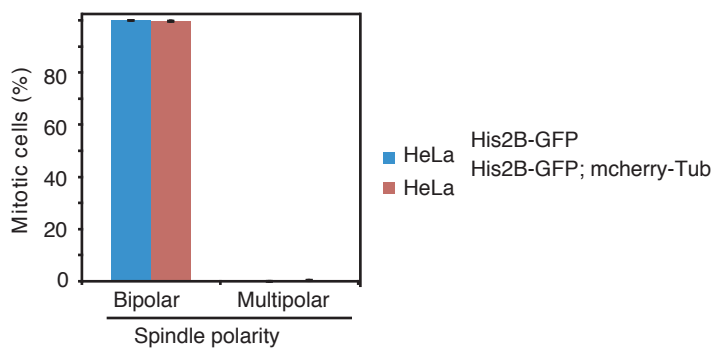

**C** Chromosome segregation accuracy

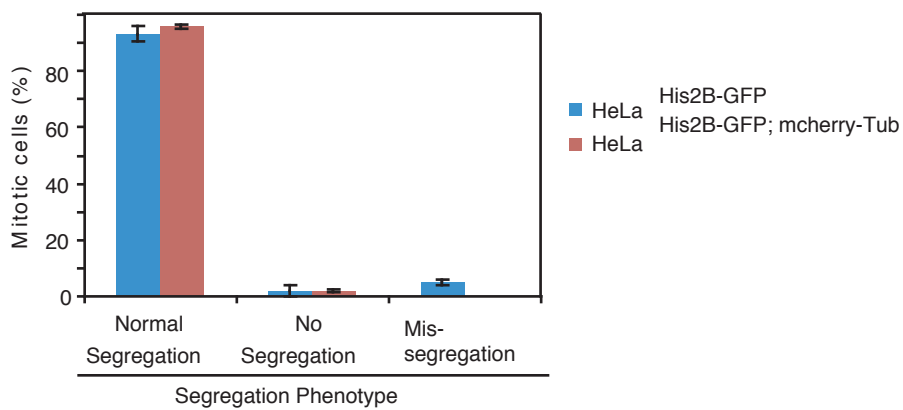

A Flow diagram of Spindle pole detection, tracking and spindle axis determination

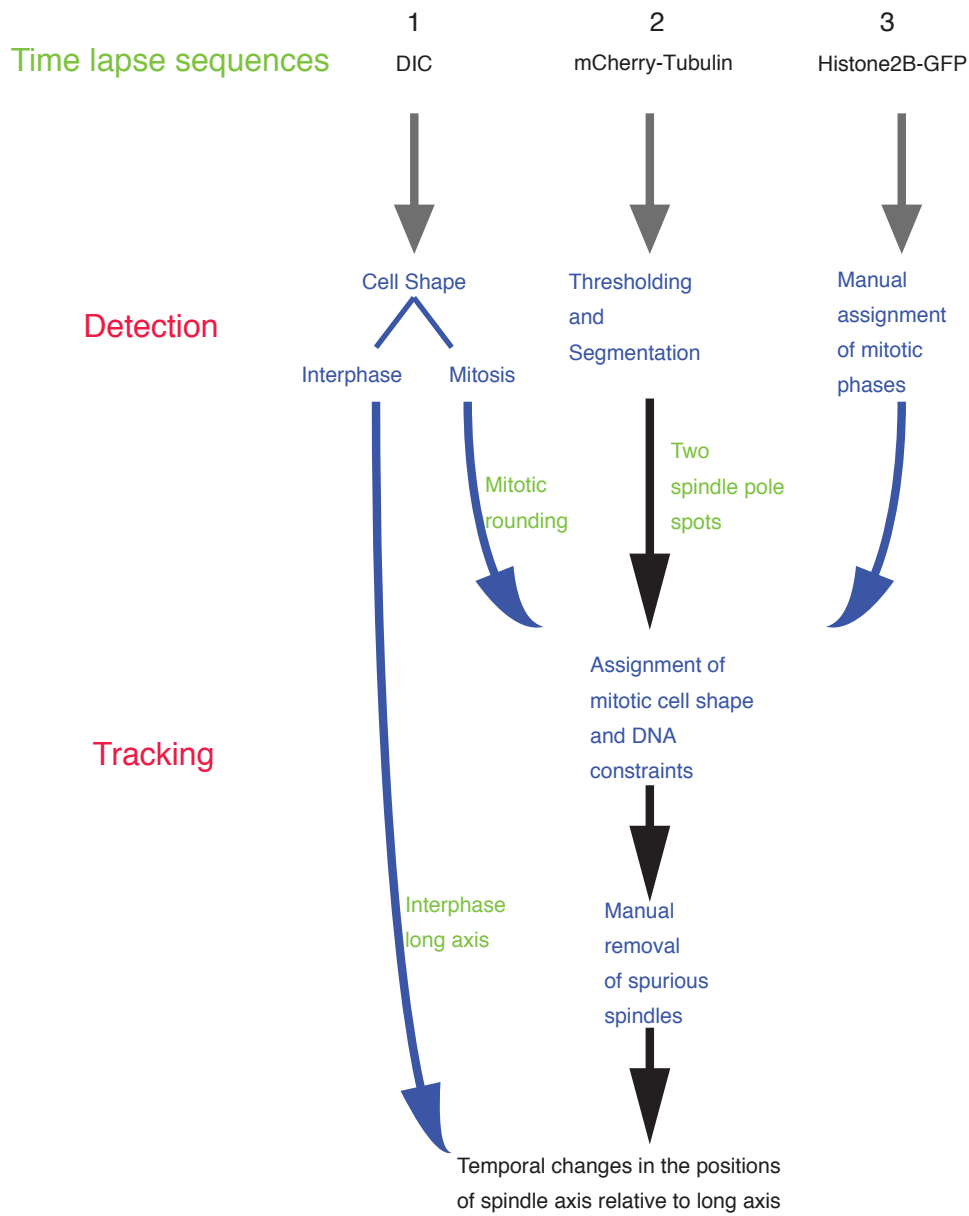

B Validation of *Spindle3D* output

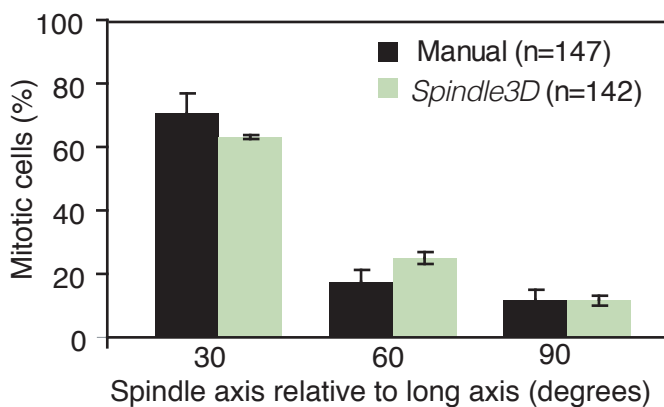

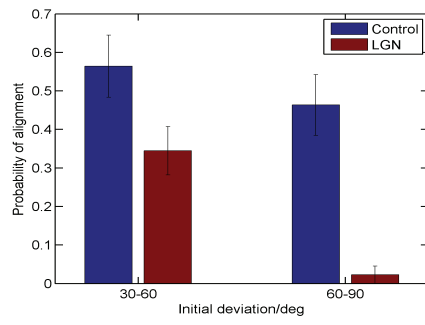

**A EB1 comet study**

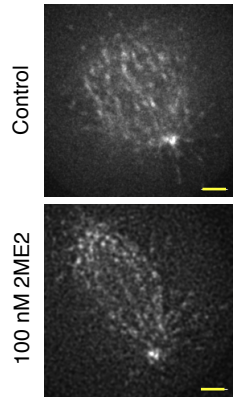

**B Microtubule length**

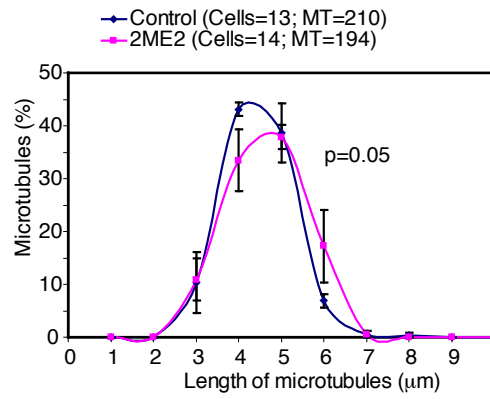

**C Anaphase timing**

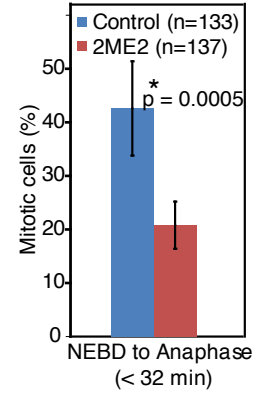

**D Time lapse analysis**

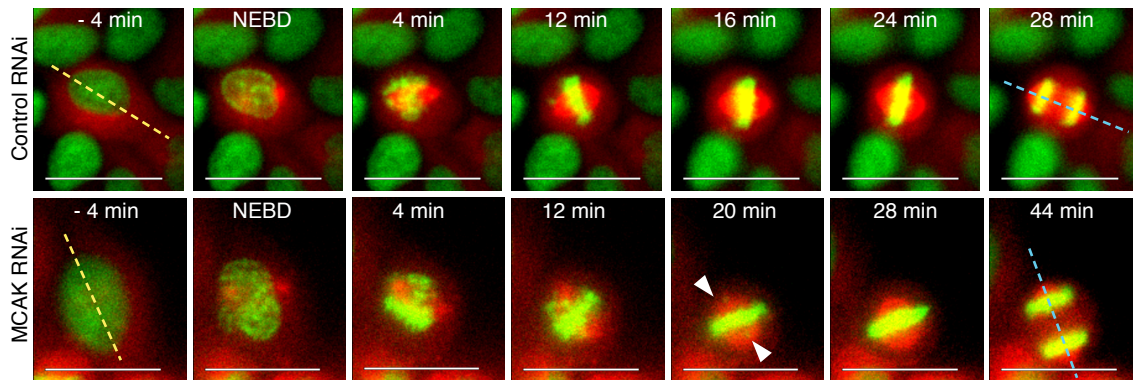

## **MOVIE LEGENDS**

### **Movie 1:**

#### **Spindle orientation is predictable in cells displaying a continuum of shapes**

Uncropped movie of HeLa<sup>His2B-GFP; mCherry-Tub</sup> cells synchronized in S-phase using aphidicolin and filmed 7 hours after aphidicolin wash. Movie was compiled using single Z plane images from 3D image stacks, acquired once every 4 minutes. Scale bar indicates 10  $\mu\text{m}$ . Movie highlights the cell-to-cell variability in rotational and oscillatory movements of the spindle.

### **Movie 2:**

#### **Cells align their spindle axis along the long-axis**

Cropped and enlarged (2X) movie of a HeLa<sup>His2B-GFP; mCherry-Tub</sup> cell that underwent synchronization, as described in Movie 1. Movie was compiled using single Z plane images from 3D image stacks, acquired once every 4 minutes. Scale bar indicates 10  $\mu\text{m}$ . Yellow line indicates interphase long-axis.

## SUPPLEMENTARY INFORMATION

### Supplementary Fig 1: Validation of spindle reporter cell line

(A) Cumulative frequency distribution of time consumed from NEBD to anaphase in HeLa cells expressing either His2B-GFP alone (HeLa<sup>His2B-GFP</sup>) or both His2B-GFP and mCherry Tubulin-DsRed (HeLa<sup>His2B-GFP; mCherry-Tub</sup>). (B) Graph of percentage of bipolar and multipolar spindles as assessed using single or multiple metaphase plates in HeLa<sup>His2B-GFP; mCherry-Tub</sup> and HeLa<sup>His2B-GFP</sup> cell lines. (C) Graph of percentage of cells that underwent normal segregation, no segregation (mitotic arrest), or mis-segregation (lagging chromatids) in HeLa<sup>His2B-GFP; mCherry-Tub</sup> and HeLa<sup>His2B-GFP</sup> cell lines, as assessed from time-lapse movies. Error bars represent SEM. n indicates the number of cells from three independent experiments.

### Supplementary Fig 2: Validation of *Spindle3D*

(A) Flow diagram of *Spindle3D* software outlining the steps of spindle pole detection, tracking and spindle axis determination as detailed in Image Processing Methods (*Spindle3D*) section. (B) Graph of frequency distributions of final orientation angles (spindle axis relative to long-axis) in Control RNAi treated HeLa<sup>His2B-GFP; mCherry-Tub</sup> cells from two independent experiments that were analysed manually and using *Spindle3D*. Error bars represent SEM values. n indicates the number of cells from two independent experiments.

### Supplementary Fig 3: Spindle alignment probability following LGN depletion

Graph shows the alignment probability of unaligned spindles in LGN depleted cells. Spindles were grouped by initial angular deviation from the long-axis into 30-60 and 60-90 degree groups. The number of cells in 30-60 group was 58 (LGN RNAi); 39 (Control RNAi) and 60-90 group was 44 (LGN RNAi); 41 (Control RNAi). Spindles beginning close to the long-axis (<30 degrees) were excluded. From each group, the fraction of spindles achieved alignment within 20 degrees of the long-axis is referred to as the alignment probability. Error bars refer to S.E.M values.

#### **Supplementary Fig 4: Validation of microtubule lesions**

**(A)** Representative still images of a single Z-plane of 3D time-lapse movies of HeLa<sup>EB1-YFP</sup> cells treated or untreated with 100 nM 2ME2 as indicated. Scale bar = 2  $\mu$ m. **(B)** Graph showing distribution of microtubule (MT) lengths ( $\mu$ m) in monopolar spindles of cells treated with monastrol for 3h and exposed to 100 nM 2ME2 or DMSO control as indicated for 1h prior to immunostaining with antibodies against  $\beta$ -tubulin and stained with DAPI (DNA dye) **(C)** Graph of percentage of 2ME2 treated or untreated cells that completed anaphase onset within 32 minutes following mitotic entry, as defined by NEBD. **(D)** Representative time-lapse images showing chromosome movements in HeLa<sup>His2B-GFP; mCherry-Tub</sup> cells in Control, MCAK siRNA treated cells. Yellow line indicates long-axis and blue indicates pole-pole spindle axis. White arrows mark uncongressed chromosomes. Scale bar= 40  $\mu$ m. Error bar refers to SEM from two (B) or three (C) experiments. p values were obtained using proportion test. # and \* refer to insignificant and significant differences, respectively.
